# Supplementary material for: Interstitial fluid pressure regulates collective invasion in engineered human breast tumorsviaSnail, vimentin, and E-cadherin
Source: Royal Society of Chemistry journal article supplement (doi:10.1039/c5ib00282f), 2016-01-26
Supplement: c5ib00282f1.pdf [file c5ib00282f1.pdf]

## Supplemental Information

### Interstitial fluid pressure regulates collective invasion in engineered human breast tumors via Snail, vimentin, and E-cadherin

Alexandra S. Piotrowski-Daspt, Joe Tien, and Celeste M. Nelson

#### Supplementary Tables and Figures

**Table S1. Primers used for quantitative real-time reverse-transcription PCR (RT-PCR)**

| gene     | sequences                                                 |
|----------|-----------------------------------------------------------|
| 18S rRNA | Fwd: CGGCGACGACCCATTCGAAC<br>Rev: GAATCGAACCCTGATTCCCCGTC |
| VIM      | Fwd: ATCAACACCGAGTTCAAG<br>Rev: GCCAGCAGGATCTTATTC        |
| SNAI1    | Fwd: CCACTCAGATGTCAAGAAG<br>Rev: GCAGGTATGGAGAGGAAG       |
| CDH1     | Fwd: CTAATTCTGATTCTGCTGCTCTTG<br>Rev: CCTCTTCTCCGCCTCCTTC |
| KRT8     | Fwd: AGTTACGGTCAACCAGAG<br>Rev: GTCTCCAGCATCTTGTTTC       |

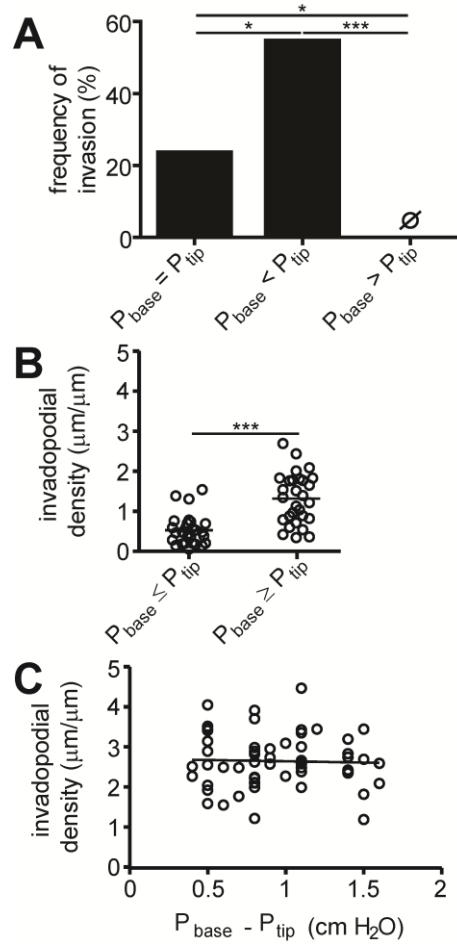

**Figure S1.** IFP controls invasive phenotype of breast and prostate cancer cells. **(A)** Frequency of invasion of PC-3 cell aggregates under  $P_{\text{base}} = P_{\text{tip}}$  ( $n = 27$ ),  $P_{\text{base}} < P_{\text{tip}}$  ( $n = 20$ ), or  $P_{\text{base}} > P_{\text{tip}}$  ( $n = 17$ ). **(B)** Invadopodial length density for MDA-MB-231 cell aggregates under  $P_{\text{base}} \leq P_{\text{tip}}$  or  $P_{\text{base}} \geq P_{\text{tip}}$ . **(C)** Invadopodial density as a function of pressure profile for MDA-MB-231 breast cancer aggregates. The solid line denotes the best least-squares linear fit. \*  $P < 0.05$ , \*\*  $P < 0.01$ , \*\*\*  $P < 0.001$ .

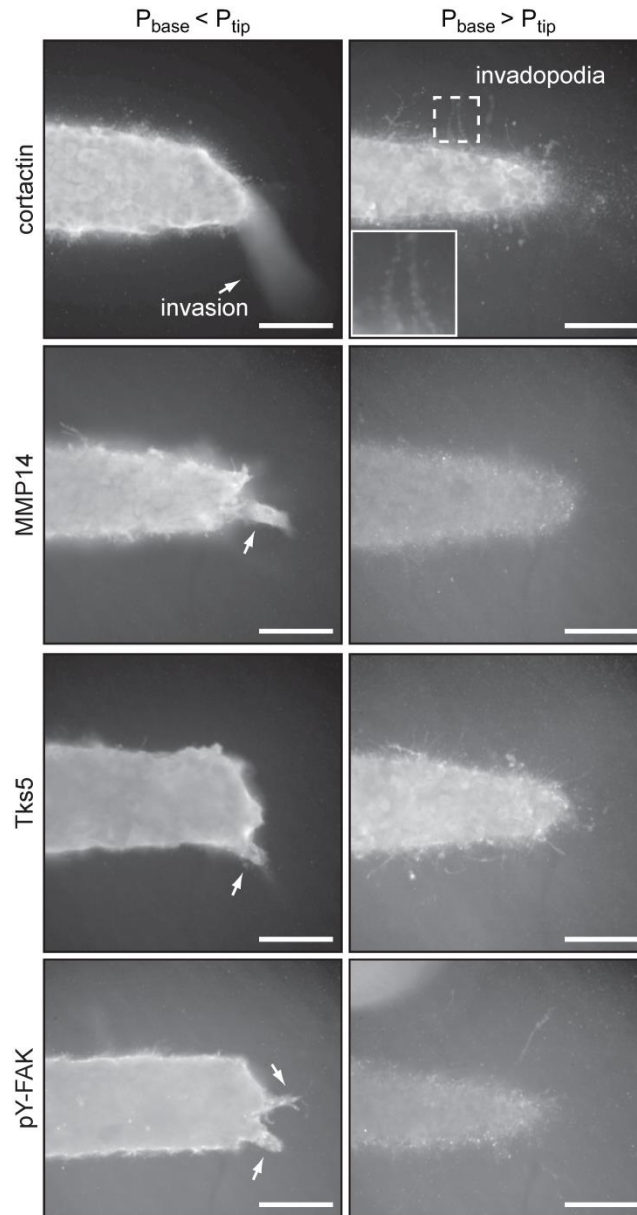

**Figure S2.** Confocal images of immunofluorescence stains for cortactin, MMP14, Tks5, and phosphorylated FAK (pY-FAK) in MDA-MB-231 cell aggregates under IFP. Arrows denote invasive protrusions containing multiple nuclei; the inset in the right cortactin image magnifies the dotted area. Scale bars, 100  $\mu\text{m}$ .

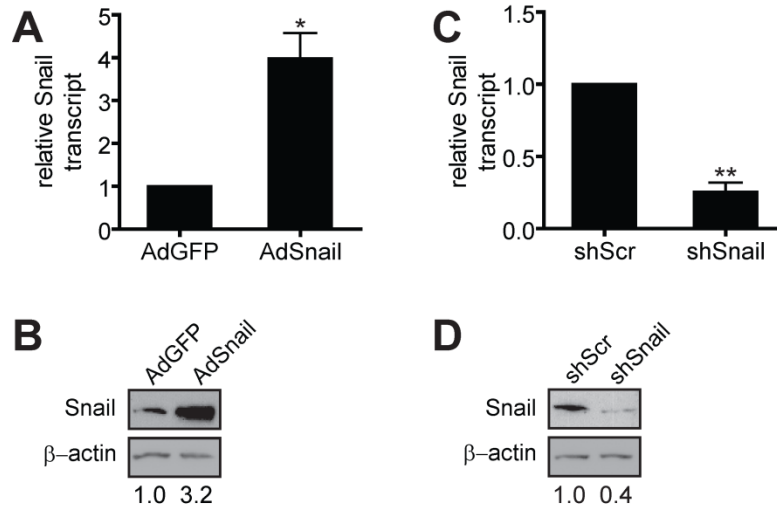

**Figure S3.** Snail expression in MDA-MB-231 cells. **(A)** Relative transcript levels of Snail in AdSnail ( $n = 3$ ) or AdGFP ( $n = 4$ ) MDA-MB-231 cells. **(B)** Immunoblot analysis of MDA-MB-231 cells transduced with AdGFP or AdSnail. **(C)** Relative transcript levels of Snail in shScr ( $n = 3$ ) or shSnail ( $n = 3$ ) MDA-MB-231 cells. **(D)** Immunoblot analysis for Snail in shScr and shSnail MDA-MB-231 cells. \*  $P < 0.05$ , \*\*  $P < 0.01$ .

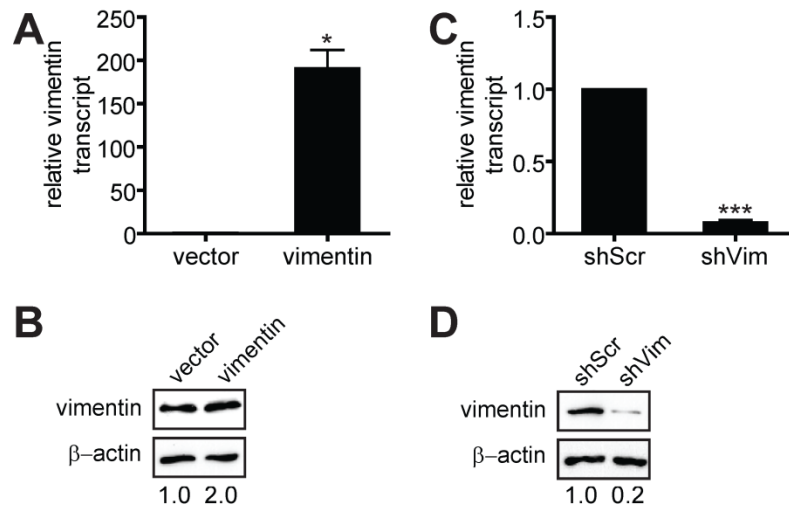

**Figure S4.** Vimentin expression in MDA-MB-231 cells. **(A)** Relative transcript levels of vimentin in vector ( $n = 3$ ) or vimentin ( $n = 3$ ) MDA-MB-231 cells. **(B)** Immunoblot of vector or vimentin MDA-MB-231 cells. **(C)** Relative transcript levels of vimentin in shScr ( $n = 3$ ) or shVim ( $n = 3$ ) MDA-MB-231 cells. **(D)** Immunoblot analysis for vimentin in shScr or shVim MDA-MB-231 cells. \*  $P < 0.05$ , \*\*\*  $P < 0.001$ .

**Figure S5.**

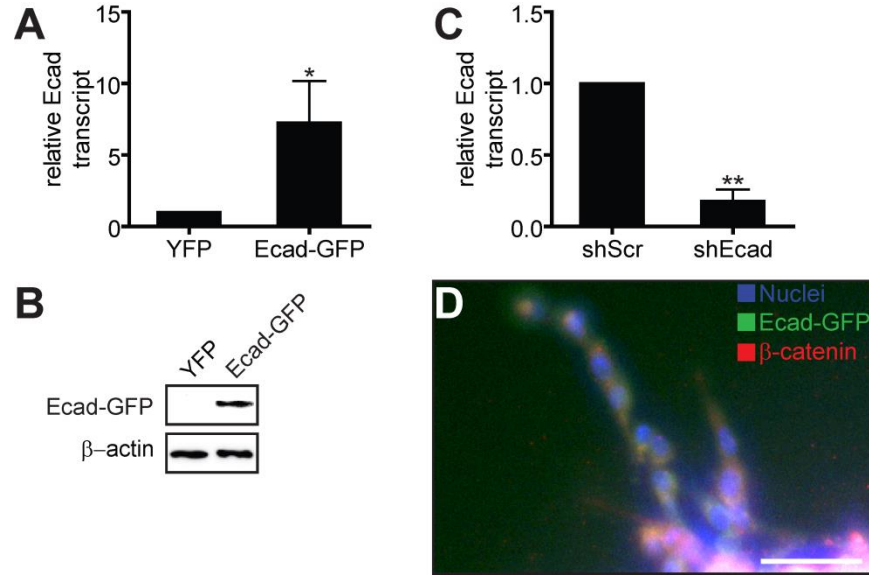

**Figure S5.** E-cadherin expression in MDA-MB-231 cells. **(A)** Relative transcript levels of E-cadherin in YFP ( $n = 3$ ) or Ecad-GFP ( $n = 3$ ) MDA-MB-231 cells. **(B)** Immunoblot analysis for E-cadherin in YFP or Ecad-GFP MDA-MB-231 cells. **(C)** Relative transcript levels of E-cadherin in shScr ( $n = 3$ ) or shEcad ( $n = 3$ ) MDA-MB-231 cells. **(D)** Immunofluorescence staining for  $\beta$ -catenin (red) and Hoechst 33342 staining of cell nuclei (blue) in invasions from an Ecad-GFP (green) aggregate under  $P_{\text{base}} < P_{\text{tip}}$ . \*  $P < 0.05$ , \*\*  $P < 0.01$ . Scale bar, 25  $\mu\text{m}$ .

**Figure S6.**

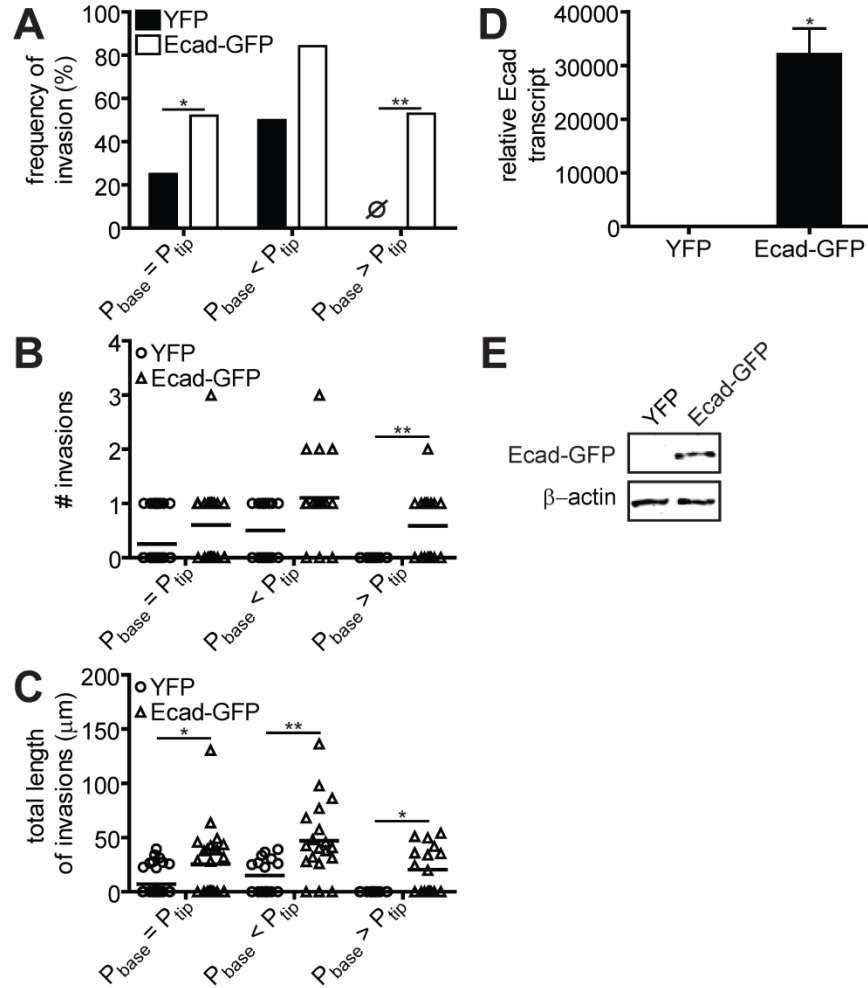

**Figure S6.** Ectopic expression of E-cadherin promotes invasion, whereas depletion of E-cadherin inhibits extensive invasion in response to IFP in PC-3 cells. **(A)** Frequency of invasion of YFP or Ecad-GFP-expressing PC-3 aggregates under  $P_{base}=P_{tip}$  (YFP:  $n = 36$ ; Ecad-GFP:  $n = 25$ ),  $P_{base}<P_{tip}$  (YFP:  $n = 16$ ; Ecad-GFP:  $n = 19$ ), or  $P_{base}>P_{tip}$  (YFP:  $n = 15$ ; Ecad-GFP:  $n = 17$ ). **(B)** Number and **(C)** length of invasions in YFP or Ecad-GFP PC-3 aggregates under IFP. **(D)** Relative transcript levels of E-cadherin in YFP ( $n = 3$ ) or Ecad-GFP ( $n = 3$ ) PC-3 cells. **(E)** Immunoblot analysis for E-cadherin in YFP- or Ecad-GFP-transfected PC-3 cells. \*  $P<0.05$ , \*\*  $P<0.01$ .
